# Supplementary material for: Interfacial modification between NiO x and perovskite layers with hexafluorophosphate salts for enhancing device efficiency and stability of perovskite solar cells
Source: Royal Society of Chemistry journal article supplement (doi:10.1039/d3lf00258f), 2024-01-01
Supplement: d3lf00258f1.pdf [file d3lf00258f1.pdf]

## Supporting Information

### Interfacial modification between NiO<sub>x</sub> and perovskite layers with hexafluorophosphate salts for enhancing device efficiency and stability of perovskite solar cells

Zong-Xuan She and Sheng-Hsiung Yang\*

Institute of Lighting and Energy Photonics, College of Photonics, National Yang Ming Chiao Tung University, No.301, Section 2, Gaofa 3rd Road, Guiren District, Tainan 711010, Taiwan R.O.C.

\*Correspondence: S.-H. Yang (yangsh@nycu.edu.tw)

Table S1. Lifetime parameters of TR-PL decay curves of the perovskite on the pristine or modified NiO<sub>x</sub> films.

| Substrate                                         | A <sub>1</sub> (%) | τ <sub>1</sub> (ns) | A <sub>2</sub> (%) | τ <sub>2</sub> (ns) | τ <sub>avg</sub> (ns) |
|---------------------------------------------------|--------------------|---------------------|--------------------|---------------------|-----------------------|
| NiO <sub>x</sub>                                  | 74.99              | 13.05               | 25.01              | 263.24              | 230.8                 |
| NiO <sub>x</sub> /NH <sub>4</sub> PF <sub>6</sub> | 38.95              | 101.98              | 61.05              | 11.562              | 88.3                  |
| NiO <sub>x</sub> /LiPF <sub>6</sub>               | 56.6               | 7.442               | 43.4               | 194.07              | 185.1                 |
| NiO <sub>x</sub> /NaPF <sub>6</sub>               | 66                 | 10.15               | 34                 | 160.5               | 144                   |

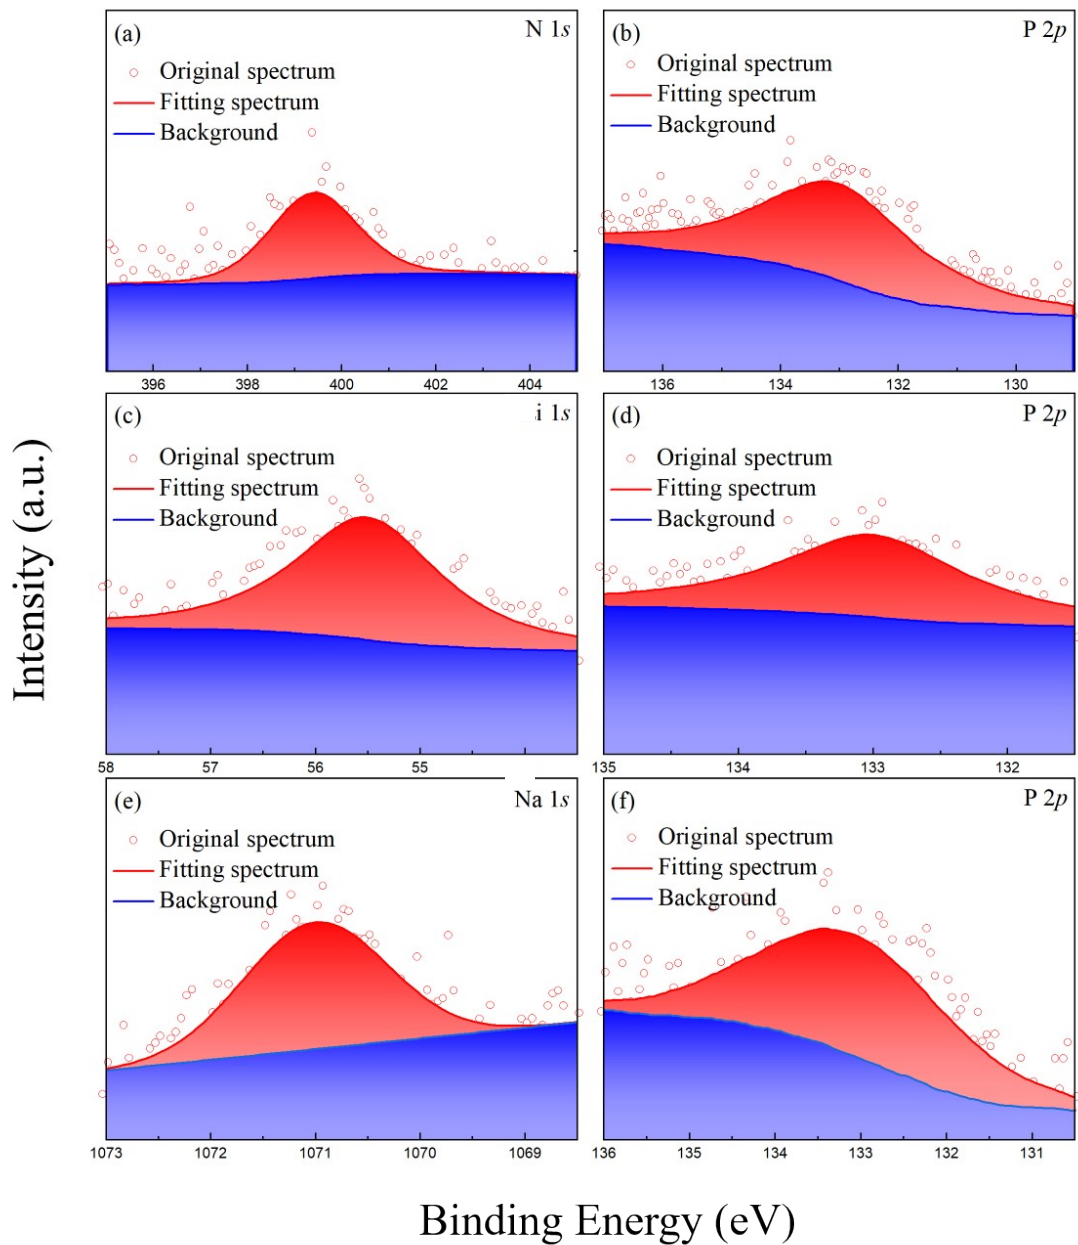

Figure S1. N  $1s$ , P  $2p$ , Li  $1s$ , and Na  $1s$  XPS spectra of (a,b)  $\text{NH}_4\text{PF}_6^-$ , (c,d)  $\text{LiPF}_6^-$ , and (e,f)  $\text{NaPF}_6^-$ -modified  $\text{NiO}_x$  films.

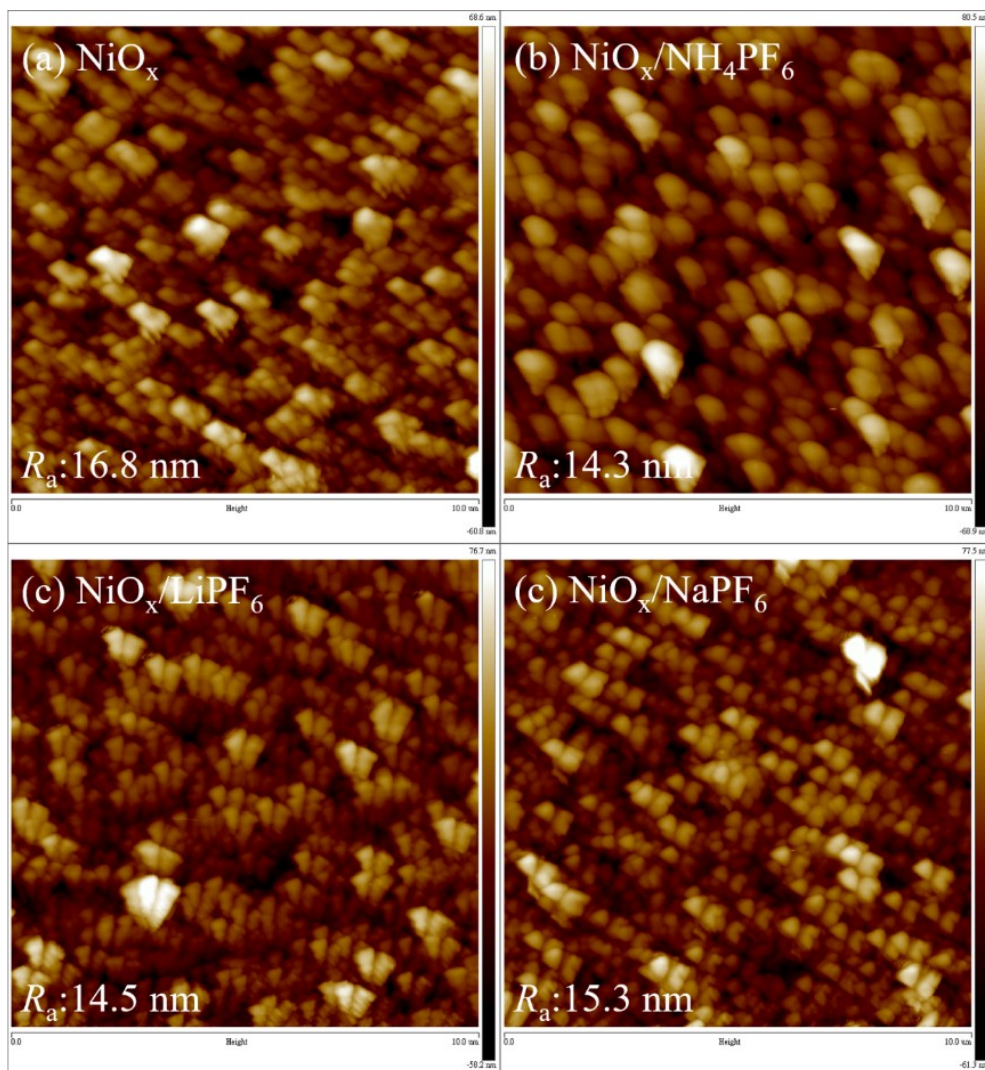

Figure S2. AFM topographic images of the pristine and modified  $\text{NiO}_x$  films.

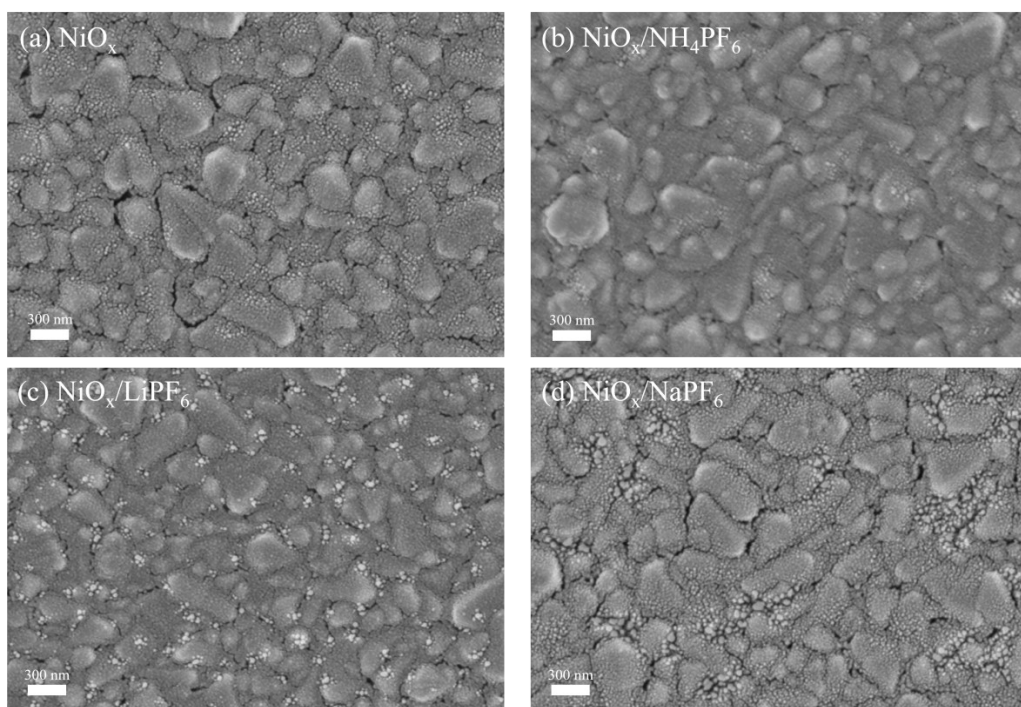

Figure S3. Top-view SEM images of the pristine and modified NiO<sub>x</sub> films.

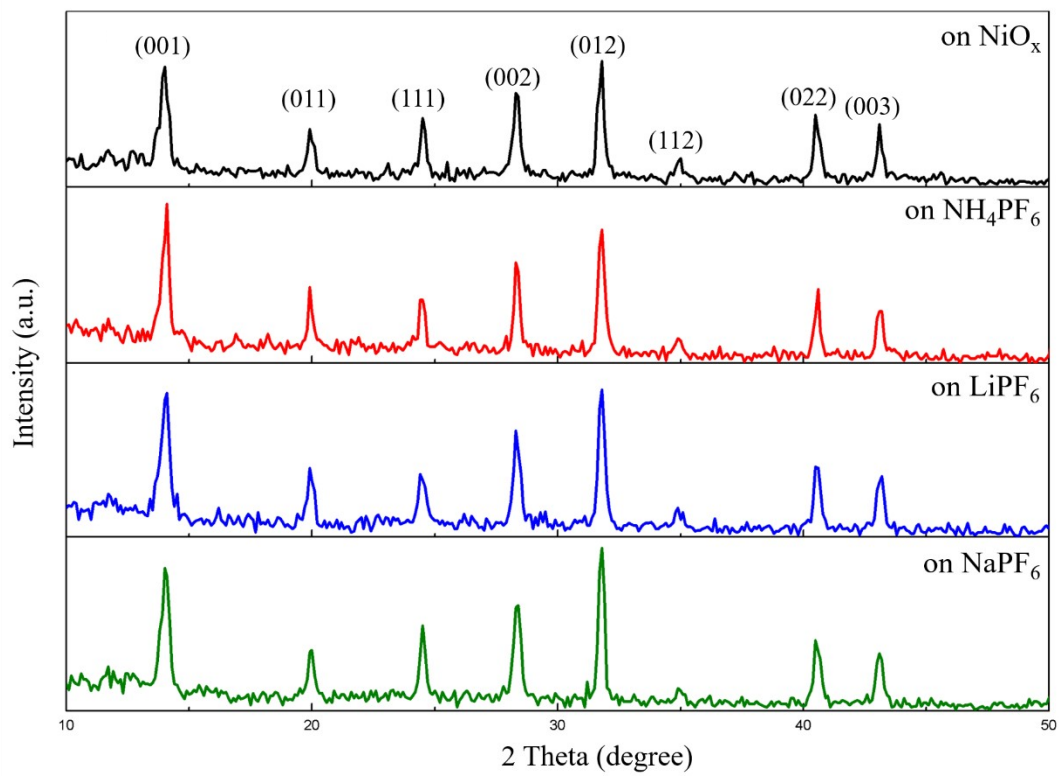

Figure S4. XRD patterns of perovskite layers on the pristine or modified NiO<sub>x</sub> films.

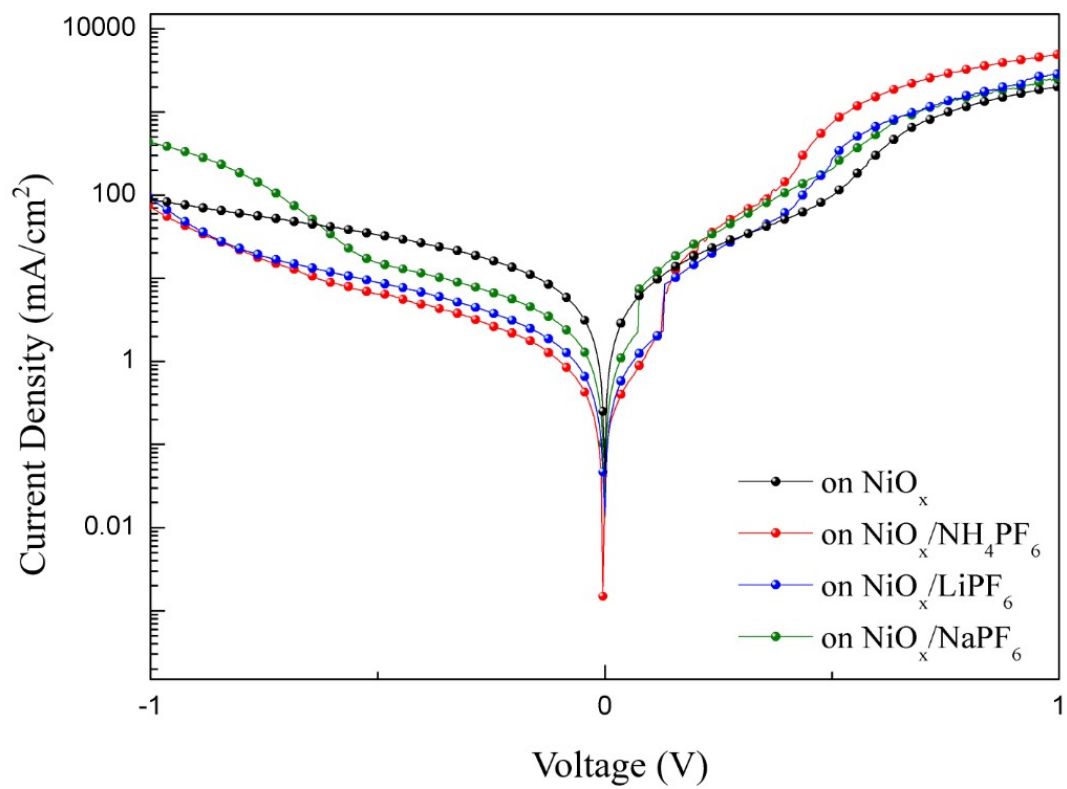

Figure S5. Dark J–V characteristics of PSCs based on the pristine and modified NiO<sub>x</sub> HTLs.
